1 Genetic structure of prey populations underlies the geographic mosaic of arms

2 race coevolution

3

4 Authors: Michael T.J. Hague<sup>1\*</sup>, Amber N. Stokes<sup>2</sup>, Chris R. Feldman<sup>3</sup>, Edmund D. Brodie, Jr.<sup>4</sup>,

5 Edmund D. Brodie III<sup>5</sup>

6

7 Affiliations:

8 <sup>1</sup> Department of Biological Sciences, University of Montana, Missoula, MT.

9 <sup>2</sup> Department of Biology, California State University, Bakersfield, CA.

10 <sup>3</sup> Department of Biology, University of Nevada, Reno, NV.

11 <sup>4</sup> Department of Biology, Utah State University, Logan, UT.

12 <sup>5</sup> Department of Biology, University of Virginia, Charlottesville, VA.

13

14 \* Correspondence to:

15 Michael T.J. Hague

16 Department of Biological Sciences, University of Montana

17 32 Campus Dr. HS 104, Missoula, MT 59812

18 Tel: (406) 243-2182

19 Email: [michael.hague@mso.umt.edu](mailto:michael.hague@mso.umt.edu)

20

21 Short title: Prey structure mosaic of coevolution

22 **Abstract:**

23           Reciprocal adaptation is the hallmark of arms race coevolution, but the symmetry of  
24 evolutionary change in each species is often untested even in the best-studied battles between  
25 natural enemies. We tested whether prey and predator exhibit a symmetrical pattern of local co-  
26 adaptation in the classic example of a geographic mosaic of coevolution between toxic newts  
27 (*Taricha granulosa*) and resistant garter snakes (*Thamnophis sirtalis*). Contrary to conventional  
28 wisdom, landscape variation in the newt toxin TTX is best predicted by neutral population  
29 divergence and not predator resistance, whereas snake resistance is clearly explained by prey  
30 toxin levels. Prey populations structure variation in levels of TTX, which in turn structures  
31 selection on predators—implying that neutral processes including gene flow, rather than  
32 reciprocal adaptation, are the primary source of variation across the coevolutionary mosaic.

33

34 **Main Text:**

35           Coevolutionary dynamics result from the reciprocal selection generated between  
36 interacting species (1, 2). Adaptation and counter-adaptation occur at the phenotypic interface of  
37 coevolution, the traits in each species that mediate interactions (3, 4). Because species  
38 interactions and their fitness consequences vary spatially, heterogeneity in the form of reciprocal  
39 selection is expected to generate a geographic mosaic of coevolution in which phenotypes of  
40 both species covary due to local conditions (2, 5–7). Coevolving species often exhibit matched  
41 trait variation across the landscape, for example, in seed traits and their predators (5, 7) or host  
42 and pathogen genotypes (8, 9), a pattern typically interpreted as a signature of local co-  
43 adaptation.

44           However, a geographic mosaic of matched phenotypes may not be solely the result of  
45 reciprocal co-adaptation (10, 11). A simpler, non-adaptive explanation for matched trait variation  
46 involves the spatial population structure and ancestry of each species. Common barriers to  
47 dispersal or a shared biogeographic history, for example, could structure phenotypic divergence  
48 congruently in co-occurring species (12). Only when phenotypic variation deviates from the  
49 neutral expectations of population structure in both species can we infer local adaptation in the  
50 geographic mosaic of coevolution (10). Otherwise, drift, gene flow, and phylogeography provide  
51 a parsimonious explanation for patterns of divergence across the landscape.

52           We tested whether neutral processes account for localized trait matching in a textbook  
53 example of a geographic mosaic of coevolution, the arms race between deadly newt prey and  
54 their resistant snake predators. In western North America, rough-skinned newts (*Taricha*  
55 *granulosa*) secrete the deadly neurotoxin tetrodotoxin (TTX), which binds to the outer pore of  
56 voltage-gated sodium channels ( $\text{Na}_v$ ) and prevents the initiation of action potentials (13, 14).

57 Common garter snakes (*Thamnophis sirtalis*) exhibit resistance to TTX that is largely due to  
58 specific amino acid substitutions in the fourth domain pore-loop (DIV p-loop) of the skeletal  
59 muscle sodium channel (Nav1.4) that disrupt toxin-binding (Fig. 1) (15, 16). Channel-level TTX  
60 resistance conferred by each allele in the DIV p-loop is tightly correlated with muscle and  
61 whole-animal levels of phenotypic resistance in *Th. sirtalis* (15–17). TTX-resistant alleles occur  
62 at high frequency in coevolutionary “hotspots” with highly toxic newts, but are largely absent in  
63 surrounding “coldspots” where newts are non-toxic, creating a putative mosaic of local  
64 adaptation in which predator and prey have roughly matched abilities at the interface of toxin-  
65 binding (11, 18, 19).

66 We conducted fine-scale population sampling of newts ( $n=138$ ) and garter snakes  
67 ( $n=169$ ) along a latitudinal transect of nine locations on the Pacific Coast in Washington and  
68 Oregon (USA) that spans the geographic mosaic (Fig. 1, Table S1), ranging from low levels of  
69 newt toxin and snake resistance (northern Washington) to a hotspot of extreme escalation in both  
70 species (central Oregon). At each location, we characterized levels of TTX in newt populations  
71 and TTX resistance in garter snakes, including whole-animal phenotypic resistance and Nav1.4  
72 channel genotypes. We then compared these data to neutral patterns of population genomic  
73 variation using single nucleotide polymorphisms (SNPs) in each species.

74 Spatial patterns of newt TTX and snake resistance were broadly consistent with previous  
75 work suggesting arms race coevolution has led to closely matched phenotypes in each species  
76 (11). TTX levels ( $\mu\text{g}/\text{cm}^2$ ) of newts varied by population (ANOVA;  $F[8,114]=37.43$ ,  $p<0.001$ )  
77 and by sex ( $F[1,114]=4.37$ ,  $p=0.039$ ) along the latitudinal transect (Fig. 1; Table S1). TTX  
78 resistance (50% MAMU dose) of snakes also varied by population (according to non-  
79 overlapping 95% confidence intervals; Fig. 1; Table S1) and was closely correlated with prey

80 toxins (Table 1). The presence of TTX-resistant alleles in the  $Na_v1.4$  channel co-varied with  
81 phenotypic resistance in garter snakes, such that pairwise  $F_{ST}$  divergence at the DIV p-loop was  
82 correlated with population divergence in phenotypic resistance (Mantel test,  $r=0.47$ ,  $p=0.032$ ).

83 Variation in levels of newt TTX, however, was best predicted by neutral population  
84 divergence, calling into question whether the covariance between prey toxins and predator  
85 resistance is a result of co-adaptation to local conditions in the geographic mosaic. We used  
86 neutral SNPs to assess population genetic structure in prey and predator and found a pattern of  
87 isolation-by-distance (IBD) in both species (distance-based redundancy analysis; newts,  $F=-$   
88  $38.528$ ,  $p=0.002$ ; snakes,  $F=22.021$ ,  $p=0.001$ ). Principal coordinate (PCoA) and Bayesian  
89 clustering (STRUCTURE) analyses indicated that newts and snakes each have a distinct spatial  
90 pattern of population structure along the transect (Fig. 2). We generated distance matrices to test  
91 whether phenotypic divergence in one species (e.g., newt TTX levels) is best explained by (1)  
92 neutral genomic divergence (pairwise  $F_{ST}$ ; Table S3) or (2) phenotypic divergence in the natural  
93 enemy (snake resistance). In univariate regressions, population divergence in the TTX level of  
94 newts was strongly predicted by neutral  $F_{ST}$  divergence ( $R^2=0.414$ ), as well as TTX resistance of  
95 garter snakes ( $R^2=0.274$ ; Table 1).  $F_{ST}$  divergence remained significant in the multiple  
96 regression, indicating that population structure of newts predicts TTX levels, even after  
97 controlling for TTX resistance of the predator (which was only marginally significant;  $p=0.065$ ).  
98 In contrast, garter snake resistance was strictly predicted by newt toxins and not neutral  $F_{ST}$   
99 divergence. Both phenotypic resistance and  $F_{ST}$  divergence at the DIV p-loop (the site of toxin-  
100 binding in  $Na_v1.4$ ) were uncorrelated with neutral  $F_{ST}$  values in garter snakes (Table 1). These  
101 results imply that neutral genetic divergence structures population variation in levels of the prey  
102 toxin, which in turn predicts TTX resistance in predator populations. The geographic structure of

103 newt populations appears to be so influential to spatial dynamics that divergence in garter snake  
104 phenotypic resistance and  $F_{ST}$  at the DIV p-loop are both significantly predicted by neutral  $F_{ST}$   
105 divergence of newts (Table 1).

106 Clinal variation in the TTX level of newts is highly congruent with neutral genomic  
107 variation based on the PCoA (Fig. 3) and Bayesian clustering analyses (Fig. S2). TTX resistance  
108 of garter snakes, in contrast, clearly deviates from neutral expectations to track variation in prey  
109 toxins. Cline-fitting analyses show that prey toxin levels and predator resistance are tightly  
110 matched along the 611 km transect; the geographic center points of each cline are located just 64  
111 km apart and do not differ statistically. The cline center of TTX-resistant alleles in snakes is also  
112 located nearby, although it differed statistically from the center of newt TTX. Despite similar  
113 phenotypic clines in prey and predator, variation in levels of newt toxin showed an even tighter  
114 match to clinal variation in neutral population structure. The center points of the TTX and neutral  
115 clines were located only 19 km apart. PC 1 from the PCoA was a strong predictor of variation in  
116 TTX levels (linear model;  $t$ -value=5.682,  $p<0.001$ ), even after controlling for the effect of TTX  
117 resistance of garter snakes (Supplemental Materials, Table S5). Conversely, variation in  
118 phenotypic resistance and TTX-resistant alleles in snakes both deviated significantly from the  
119 neutral cline (Fig. 3), such that resistance was not predicted by PCs 1 or 2 from the PCoA (Table  
120 S5). The center points of the snake phenotypic resistance and neutral clines were located a  
121 distant 310 km apart.

122 Levels of prey toxin and predator resistance are tightly matched across the landscape, but  
123 this pattern does not appear to be the primary result of local co-adaptation in the arms race.  
124 Although predator resistance is geographically structured by a signature of local adaptation to  
125 prey, levels of prey toxin are clearly structured according to neutral population divergence.

126 These results imply that mosaic variation in newt toxins is largely explained by non-adaptive  
127 processes, such as drift and historical biogeography, rather than spatially variable adaptation. For  
128 example, latitudinal patterns of newt TTX and neutral divergence are both consistent with a  
129 population history of northward expansion after the Pleistocene glacial period (20). Toxin levels  
130 in the newts may have been under strong selection in the past, particularly at the southern end of  
131 the transect, but now it is predominantly subject to neutral processes like drift and gene flow.

132 The asymmetric signatures of adaptation we observed in prey and predator may reflect  
133 differences in the mechanisms that underlie phenotypic variation in each species. The  
134 evolutionary response in newts may be obscured by environmental effects that disproportionately  
135 contribute to variance in TTX levels compared to resistance of snakes. Little is known about the  
136 production of TTX, but some researchers suggest exogenous factors, like environmentally-  
137 derived precursors, may affect the ability of newts to synthesize or sequester TTX (21, 22).  
138 Evidence from the California newt (*Ta. torosa*) suggests TTX levels could also be a plastic  
139 response to sustained stressful conditions such as predation (23). On the other hand, TTX  
140 resistance in garter snakes is largely due to a small number of amino acid changes to the p-loops  
141 of the Na<sub>v</sub>1.4 channel (15–17, 19). These large-effect mutations could make TTX resistance  
142 more evolutionarily labile than toxicity, permitting rapid local adaptation in predator populations  
143 (11, 17).

144 Asymmetric patterns of evolution could also arise from a selective imbalance associated  
145 with the interactions between prey and predator. In antagonistic interactions, the species under  
146 more intense selection is generally expected to be better adapted to local conditions (24). While  
147 prey are typically thought to experience stronger selection than their predators (the “life-dinner  
148 principle”) (25), this asymmetry may be reversed when prey contain deadly toxins like TTX (3).

149 In fact, populations in central Oregon are the most toxic newts known (*11*), so non-resistant  
150 predators should experience severe fitness consequences.

151 Non-adaptive processes of drift and gene flow provide a parsimonious explanation for  
152 landscape-level patterns of variation in newt TTX, but the extreme exaggeration in levels of prey  
153 toxins and predator resistance in some locations is likely the result of arms race coevolution.  
154 Reciprocal coevolution may be ongoing in hotspots, like central Oregon, while levels of newt  
155 TTX in surrounding regions are spatially structured according to patterns of gene flow. This  
156 overall pattern establishes the important role of “trait remixing”, a largely untested component of  
157 the geographic mosaic theory that is thought to generate spatial variation in species interactions  
158 (*2, 10*). The neutral processes of drift and gene flow (termed “trait remixing”) are predicted to  
159 continually alter the spatial distribution of allelic and phenotypic variation, potentially interfering  
160 with local selection. Gene flow outwards from hotspots of coevolution is predicted to alter  
161 dynamics in surrounding populations (*26, 27*), and if gene flow is high, the population with the  
162 strongest reciprocal effects on fitness is expected to dictate broader landscape patterns of trait  
163 variation (*24, 26, 28*). The homogenizing effects of gene flow may be less influential in snake  
164 populations due to the simple genetic basis of TTX resistance or strong selection on predators.

165 Our results underscore that landscape patterns of phenotypic matching in natural enemies  
166 are not the inherent result of coevolution (*10*). External factors such as abiotic conditions (*29*),  
167 evolutionary constraints (*30*), or interactions with other species (*31*) are likely to have unique  
168 effects on the evolution of prey and predator. In the newt-snake arms race, it appears that neutral  
169 processes and population structure disproportionally affect toxin levels in newts, which in turn,  
170 determines mosaic patterns of phenotypic variation in both species across the landscape. The  
171 evolutionary response to selection at the phenotypic interface is almost certain to differ in two



172 interacting species—so much so that coevolution may not always be the most parsimonious

173 explanation for observed patterns of phenotypic divergence and trait matching across the

174 geographic mosaic.

175

176 **References and Notes:**

- 177 1. D. H. Janzen, When is it coevolution? *Evolution* (1980).
- 178 2. J. N. Thompson, *The Geographic Mosaic of Coevolution* (University of Chicago Press,  
179 Chicago, 2005).
- 180 3. E. D. Brodie III, E. D. Brodie Jr, Predator-prey arms races. *BioScience*. **49**, 557–568  
181 (1999).
- 182 4. E. D. Brodie III, B. J. Ridenhour, Reciprocal selection at the phenotypic interface of  
183 coevolution. *Integr. Comp. Biol.* **43**, 408–418 (2003).
- 184 5. C. W. Benkman, T. L. Parchman, A. Favis, A. M. Siepielski, Reciprocal selection causes a  
185 coevolutionary arms race between crossbills and lodgepole pine. *Am. Nat.* **162**, 182–194  
186 (2003).
- 187 6. A. R. Zangerl, M. R. Berenbaum, Phenotype matching in wild parsnip and parsnip  
188 webworms: causes and consequences. *Evolution*. **57**, 806–815 (2003).
- 189 7. H. Toju, S. Ueno, F. Taniguchi, T. Sota, Metapopulation structure of a seed-predator weevil  
190 and its host plant in arms race coevolution. *Evolution*. **65**, 1707–1722 (2011).
- 191 8. C. M. Lively, M. F. Dybdahl, Parasite adaptation to locally common host genotypes.  
192 *Nature*. **405**, 679 (2000).
- 193 9. P. H. Thrall, J. Burdon, J. D. Bever, Local adaptation in the *Linum marginale*—*Melampsora*  
194 *lini* host-pathogen interaction. *Evolution*. **56**, 1340–1351 (2002).
- 195 10. R. Gomulkiewicz *et al.*, Dos and don'ts of testing the geographic mosaic theory of  
196 coevolution. *Heredity*. **98**, 249–258 (2007).
- 197 11. C. T. Hanifin, E. D. Brodie, Jr., E. D. Brodie III, Phenotypic mismatches reveal escape  
198 from arms-race coevolution. *PLoS Biol.* **6**, e60 (2008).
- 199 12. N. G. Swenson, D. J. Howard, A. E. M. E. Hellberg, E. J. B. Losos, Clustering of contact  
200 zones, hybrid zones, and phylogeographic breaks in North America. *Am. Nat.* **166**, 581–591  
201 (2005).
- 202 13. H. A. Fozzard, G. M. Lipkind, The tetrodotoxin binding site is within the outer vestibule of  
203 the sodium channel. *Mar. Drugs*. **8**, 219–234 (2010).
- 204 14. D. B. Tikhonov, B. S. Zhorov, Architecture and pore block of Eukaryotic voltage-gated  
205 sodium channels in view of NavAb bacterial sodium channel structure. *Mol. Pharmacol.*  
206 **82**, 97–104 (2012).
- 207 15. S. Geffeney, E. D. Brodie, Jr., P. C. Ruben, E. D. Brodie III, Mechanisms of adaptation in a  
208 predator-prey arms race: TTX-resistant sodium channels. *Science*. **297**, 1336–1339 (2002).

- 209 16. S. L. Geffeney, E. Fujimoto, E. D. Brodie III, E. D. Brodie, Jr., P. C. Ruben, Evolutionary  
210 diversification of TTX-resistant sodium channels in a predator-prey interaction. *Nature*.  
211 **434**, 759–763 (2005).
- 212 17. C. R. Feldman, E. D. Brodie, Jr., E. D. Brodie III, M. E. Pfrender, Genetic architecture of a  
213 feeding adaptation: garter snake (*Thamnophis*) resistance to tetrodotoxin bearing prey.  
214 *Proc. R. Soc. B Biol. Sci.* **277**, 3317–3325 (2010).
- 215 18. E. D. Brodie, Jr., B. J. Ridenhour, E. D. Brodie III, The evolutionary response of predators  
216 to dangerous prey: hotspots and coldspots in the geographic mosaic of coevolution between  
217 garter snakes and newts. *Evolution*. **56**, 2067–2082 (2002).
- 218 19. M. T. J. Hague, C. R. Feldman, E. D. Brodie, Jr., E. D. Brodie III, Convergent adaptation to  
219 dangerous prey proceeds through the same first-step mutation in the garter snake  
220 *Thamnophis sirtalis*. *Evolution*. **71**, 1504–1518 (2017).
- 221 20. B. J. Ridenhour, E. D. Brodie, Jr., E. D. Brodie III, Patterns of genetic differentiation in  
222 *Thamnophis* and *Taricha* from the Pacific Northwest. *J. Biogeogr.* **34**, 724–735 (2007).
- 223 21. M. Yotsu, M. Iorizzi, T. Yasumoto, Distribution of tetrodotoxin, 6-epitetrodotoxin, and 11-  
224 deoxytetrodotoxin in newts. *Toxicon*. **28**, 238–241 (1990).
- 225 22. T. Yasumoto, M. Yotsu-Yamashita, Chemical and etiological studies on tetrodotoxin and its  
226 analogs. *Toxin Rev.* **15**, 81–90 (1996).
- 227 23. G. M. Bucciarelli, H. B. Shaffer, D. B. Green, L. B. Kats, An amphibian chemical defense  
228 phenotype is inducible across life history stages. *Sci. Rep.* **7** (2017).
- 229 24. S. Gandon, Local adaptation and the geometry of host–parasite coevolution. *Ecol. Lett.* **5**,  
230 246–256 (2002).
- 231 25. R. Dawkins, J. R. Krebs, Arms races between and within species. *Proc. R. Soc. Lond. B*  
232 *Biol. Sci.* **205**, 489–511 (1979).
- 233 26. R. Gomulkiewicz, J. N. Thompson, R. D. Holt, Nuismer Scott L., M. E. Hochberg, Hot  
234 spots, cold spots, and the geographic mosaic theory of coevolution. *Am. Nat.* **156**, 156–174  
235 (2000).
- 236 27. J. N. Thompson, S. L. Nuismer, R. Gomulkiewicz, Coevolution and maladaptation. *Integr.*  
237 *Comp. Biol.* **42**, 381–387 (2002).
- 238 28. S. Gandon, Y. Michalakis, Local adaptation, evolutionary potential and host–parasite  
239 coevolution: interactions between migration, mutation, population size and generation time.  
240 *J. Evol. Biol.* **15**, 451–462 (2002).
- 241 29. S. G. Johnson, C. D. Hulsey, F. J. G. León, Spatial mosaic evolution of snail defensive  
242 traits. *BMC Evol. Biol.* **7**, 1–11 (2007).

- 243 30. M. T. J. Hague *et al.*, Large-effect mutations generate trade-off between predatory and  
244 locomotor ability during arms race coevolution with deadly prey. *Evol. Lett.* **2**, 406–416  
245 (2018).
- 246 31. C. W. Benkman, W. C. Holimon, J. W. Smith, The influence of a competitor on the  
247 geographic mosaic of coevolution between crossbills and lodgepole pine. *Evolution.* **55**,  
248 282–294 (2001).
- 249 32. B. G. Gall *et al.*, Tetrodotoxin levels in larval and metamorphosed newts (*Taricha*  
250 *granulosa*) and palatability to predatory dragonflies. *Toxicon.* **57**, 978–983 (2011).
- 251 33. A. N. Stokes, B. L. Williams, S. S. French, An improved competitive inhibition enzymatic  
252 immunoassay method for tetrodotoxin quantification. *Biol. Proced. Online.* **14**, 3 (2012).
- 253 34. C. T. Hanifin, E. D. Brodie III, E. D. Brodie, Jr., Tetrodotoxin levels of the rough-skin  
254 newt, *Taricha granulosa*, increase in long-term captivity. *Toxicon.* **40**, 1149–1153 (2002).
- 255 35. C. T. Hanifin, E. D. Brodie III, E. D. Brodie, Jr., A predictive model to estimate total skin  
256 tetrodotoxin in the newt *Taricha granulosa*. *Toxicon.* **43**, 243–249 (2004).
- 257 36. M. T. J. Hague *et al.*, Toxicity and population structure of the Rough-Skinned Newt  
258 (*Taricha granulosa*) outside the range of an arms race with resistant predators. *Ecol. Evol.*  
259 **6**, 2714–2724 (2016).
- 260 37. S. A. Murray, T. K. Mihali, B. A. Neilan, Extraordinary conservation, gene loss, and  
261 positive selection in the evolution of an ancient neurotoxin. *Mol. Biol. Evol.* **28**, 1173–1182  
262 (2010).
- 263 38. E. D. Brodie III, E. D. Brodie, Jr., Tetrodotoxin resistance in garter snakes: an evolutionary  
264 response of predators to dangerous prey. *Evolution.* **44**, 651–659 (1990).
- 265 39. B. J. Ridenhour, E. D. Brodie III, E. D. Brodie, Jr., Resistance of neonates and field-  
266 collected garter snakes (*Thamnophis* spp.) to tetrodotoxin. *J. Chem. Ecol.* **30**, 143–154  
267 (2004).
- 268 40. B. Ridenhour, thesis, Indiana University, Bloomington, IN (2004).
- 269 41. M. Lynch, B. Walsh, others, *Genetics and analysis of quantitative traits* (Sinauer  
270 Sunderland, MA, 1998), vol. 1.
- 271 42. D. Bates, M. Mächler, B. Bolker, S. Walker, Fitting linear mixed-effects models using  
272 lme4. *J. Stat. Softw.* **67**, 1–48 (2015).
- 273 43. G. Cumming, S. Finch, Inference by eye: Confidence intervals and how to read pictures of  
274 data. *Am. Psychol.* **60**, 170–180 (2005).

- 275 44. B. Vicoso, J. Emerson, Y. Zektser, S. Mahajan, D. Bachtrog, Comparative sex chromosome  
276 genomics in snakes: differentiation, evolutionary strata, and lack of global dosage  
277 compensation. *PLoS Biol.* **11**, e1001643 (2013).
- 278 45. B. Augstenová *et al.*, ZW, XY, and yet ZW: Sex chromosome evolution in snakes even  
279 more complicated. *Evolution.* **72**, 1701–1707 (2018).
- 280 46. M. Stephens, N. J. Smith, P. Donnelly, A new statistical method for haplotype  
281 reconstruction from population data. *Am. J. Hum. Genet.* **68**, 978–989 (2001).
- 282 47. J. Graffelman, J. Morales-Camarena, Graphical tests for Hardy-Weinberg Equilibrium  
283 based on the ternary plot. *Hum. Hered.* **65**, 77–84 (2008).
- 284 48. J. Graffelman, B. S. Weir, Multi-allelic exact tests for Hardy–Weinberg equilibrium that  
285 account for gender. *Mol. Ecol. Resour.* **18**, 461–473 (2018).
- 286 49. J. Graffelman, B. S. Weir, On the testing of Hardy-Weinberg proportions and equality of  
287 allele frequencies in males and females at biallelic genetic markers. *Genet. Epidemiol.* **42**,  
288 34–48 (2018).
- 289 50. J. Graffelman, B. Weir, Testing for Hardy–Weinberg equilibrium at biallelic genetic  
290 markers on the X chromosome. *Heredity.* **116**, 558 (2016).
- 291 51. L. Excoffier, H. E. L. Lischer, Arlequin suite ver 3.5: a new series of programs to perform  
292 population genetics analyses under Linux and Windows. *Mol. Ecol. Resour.* **10**, 564–567  
293 (2010).
- 294 52. B. K. Peterson, J. N. Weber, E. H. Kay, H. S. Fisher, H. E. Hoekstra, Double digest  
295 RADseq: An inexpensive method for de novo SNP discovery and genotyping in model and  
296 non-model species. *PLoS ONE.* **7**, e37135–11 (2012).
- 297 53. S. Andrew, *FastQC* (2016; <https://www.bioinformatics.babraham.ac.uk/projects/fastqc/>).
- 298 54. J. Catchen, P. A. Hohenlohe, S. Bassham, A. Amores, W. A. Cresko, Stacks: an analysis  
299 tool set for population genomics. *Mol. Ecol.* **22**, 3124–3140 (2013).
- 300 55. B. Langmead, S. L. Salzberg, Fast gapped-read alignment with Bowtie 2. *Nat. Methods.* **9**,  
301 357–359 (2012).
- 302 56. B. Gruber, P. J. Unmack, O. F. Berry, A. Georges, dartr: An r package to facilitate analysis  
303 of SNP data generated from reduced representation genome sequencing. *Mol. Ecol. Resour.*  
304 (2017).
- 305 57. R Core Team, *R: A Language and Environment for Statistical Computing* (R Foundation  
306 for Statistical Computing, Vienna, Austria, 2018; <https://www.R-project.org/>).
- 307 58. M. Foll, O. Gaggiotti, A genome-scan method to identify selected loci appropriate for both  
308 dominant and codominant markers: a Bayesian perspective. *Genetics.* **180**, 977–993 (2008).

- 309 59. M. Nei, *Molecular evolutionary genetics* (Columbia University Press, 1987).
- 310 60. J. Goudet, T. Jombart, *hierfstat: Estimation and Tests of Hierarchical F-Statistics* (2015;  
311 <https://CRAN.R-project.org/package=hierfstat>).
- 312 61. B. S. Weir, C. C. Cockerham, Estimating F-statistics for the analysis of population  
313 structure. *evolution*. **38**, 1358–1370 (1984).
- 314 62. L. W. Pembleton, N. O. I. Cogan, J. W. Forster, StAMPP: an R package for calculation of  
315 genetic differentiation and structure of mixed-ploidy level populations. *Mol. Ecol. Resour.*  
316 **13**, 946–952 (2013).
- 317 63. F. Rousset, Genetic differentiation and estimation of gene flow from F-statistics under  
318 isolation by distance. *Genetics*. **145**, 1219–1228 (1997).
- 319 64. P. Legendre, M.-J. Fortin, Comparison of the Mantel test and alternative approaches for  
320 detecting complex multivariate relationships in the spatial analysis of genetic data. *Mol.*  
321 *Ecol. Resour.* **10**, 831–844 (2010).
- 322 65. P. G. Meirmans, Seven common mistakes in population genetics and how to avoid them.  
323 *Mol. Ecol.* **24**, 3223–3231 (2015).
- 324 66. J. Oksanen *et al.*, *vegan: Community Ecology Package* (2018; [https://CRAN.R-](https://CRAN.R-project.org/package=vegan)  
325 [project.org/package=vegan](https://CRAN.R-project.org/package=vegan)).
- 326 67. J. K. Pritchard, M. Stephens, P. Donnelly, Inference of population structure using  
327 multilocus genotype data. *Genetics*. **155**, 945–959 (2000).
- 328 68. D. Falush, M. Stephens, J. K. Pritchard, Inference of population structure using multilocus  
329 genotype data: linked loci and correlated allele frequencies. *Genetics*. **164**, 1567–1587  
330 (2003).
- 331 69. D. A. Earl, B. M. vonHoldt, STRUCTURE HARVESTER: a website and program for  
332 visualizing STRUCTURE output and implementing the Evanno method. *Conserv. Genet.*  
333 *Resour.* **4**, 359–361 (2012).
- 334 70. G. Evanno, S. Regnaut, J. Goudet, Detecting the number of clusters of individuals using the  
335 software structure: a simulation study. *Mol. Ecol.* **14**, 2611–2620 (2005).
- 336 71. M. Jakobsson, N. A. Rosenberg, CLUMPP: a cluster matching and permutation program for  
337 dealing with label switching and multimodality in analysis of population structure.  
338 *Bioinformatics*. **23**, 1801–1806 (2007).
- 339 72. R. M. Francis, pophelper: An R package and web app to analyse and visualise population  
340 structure. *Mol. Ecol. Resour.* **17**, 27–32 (2017).

- 341 73. B. F. J. Manly, Randomization and regression methods for testing for associations with  
342 geographical, environmental and biological distances between populations. *Res. Popul.*  
343 *Ecol.* **28**, 201–218 (1986).
- 344 74. P. E. Smouse, J. C. Long, R. R. Sokal, Multiple regression and correlation extensions of the  
345 mantel test of matrix correspondence. *Syst. Zool.* **35**, 627 (1986).
- 346 75. P. Legendre, F.-J. Lapointe, P. Casgrain, Modeling brain evolution from behavior: a  
347 permutational regression approach. *Evolution.* **48**, 1487–1499 (1994).
- 348 76. J. W. Lichstein, Multiple regression on distance matrices: a multivariate spatial analysis  
349 tool. *Plant Ecol.* **188**, 117–131 (2007).
- 350 77. E. B. Rosenblum, Convergent evolution and divergent selection: lizards at the White Sands  
351 ecotone. *Am. Nat.* (2005).
- 352 78. N. Raufaste, F. Rousset, Are partial mantel tests adequate? *Evolution.* **55**, 1703–1705  
353 (2001).
- 354 79. F. Rousset, D. Waller, Partial Mantel tests: reply to Castellano and Balletto. *Evolution.* **56**,  
355 1874–1875 (2002).
- 356 80. J. M. Szymura, N. H. Barton, Genetic analysis of a hybrid zone between the fire-bellied  
357 toads, *Bombina bombina* and *B. variegata*, near Cracow in southern Poland. *Evolution.* **40**,  
358 1141–1159 (1986).
- 359 81. J. M. Szymura, N. H. Barton, The genetic structure of the hybrid zone between the fire-  
360 bellied toads *Bombina bombina* and *B. variegata*: comparisons between transects and  
361 between loci. *Evolution.* **45**, 237–261 (1991).
- 362 82. E. P. Derryberry, G. E. Derryberry, J. M. Maley, R. T. Brumfield, HZAR: hybrid zone  
363 analysis using an R software package. *Mol. Ecol. Resour.* **14**, 652–663 (2014).
- 364 83. D. T. Baldassarre, T. A. White, J. Karubian, M. S. Webster, Genomic and morphological  
365 analysis of a semipermeable avian hybrid zone suggests asymmetrical introgression of a  
366 sexual signal. *Evolution.* **68**, 2644–2657 (2014).
- 367 84. E. S. Scordato *et al.*, Genomic variation across two barn swallow hybrid zones reveals traits  
368 associated with divergence in sympatry and allopatry. *Mol. Ecol.* **26**, 5676–5691 (2017).
- 369 85. J. Fox, S. Weisberg, *An R companion to applied regression* (Sage, Thousand Oaks CA,  
370 Second., 2011; <http://socserv.socsci.mcmaster.ca/~jfox/Books/Companion>).
- 371 86. S. Nakagawa, H. Schielzeth, A general and simple method for obtaining  $R^2$  from  
372 generalized linear mixed-effects models. *Methods Ecol. Evol.* **4**, 133–142 (2013).
- 373 87. K. Bartoń, *MuMIn: Multi-Model Inference* (2018; [https://CRAN.R-](https://CRAN.R-project.org/package=MuMIn)  
374 [project.org/package=MuMIn](https://CRAN.R-project.org/package=MuMIn)).

375 **Acknowledgements:**

376 We thank the Departments of Fish and Wildlife in Washington and Oregon for scientific  
377 collecting permits to MTJH (18-082 and 063-18, respectively). We also thank IACUC for the  
378 protocol to EDB Jr. at USU (1008). We are grateful for Tanner St. Pierre's help with fieldwork.  
379 R. Cox, D. Taylor, A. Bergland, D. Carr, and the Brodie and Feldman lab groups provided  
380 helpful comments that improved this manuscript. **Funding:** This work was supported by a  
381 Doctoral Dissertation Improvement Grant from the National Science Foundation to MTJH and  
382 EDB III (DEB 1601296). **Author contributions:** MTJH designed the project, collected  
383 specimens, generated genetic data, and performed statistical analyses. ANS collected phenotypic  
384 data on newt TTX levels. CRF collected specimens and phenotypic data on snake resistance.  
385 EDB Jr. collected phenotypic data on snake resistance and provided leadership on the project.  
386 EDB III designed the project and provided leadership. All authors prepared the manuscript.  
387 **Competing interests:** The authors declare no conflict of interest with this manuscript. **Data and**  
388 **materials availability:** DNA sequence alignments for the DIV p-loop of Na<sub>v</sub>1.4 and the  
389 ddRADseq data will be made available on GenBank upon manuscript acceptance. All phenotypic  
390 data and the code for statistical analyses will be submitted to Dryad upon acceptance.



391 **List of Supplementary Materials:**

392 Materials and Methods

393 Supplementary Text

394 Figures S1-S2

395 Tables S1-S5

396 References (32-87)

397 **Fig. 1. Matching phenotypes in prey and predator imply arms race coevolution.** (A)  
 398 Population means of TTX levels ( $\mu\text{g}/\text{cm}^2$ ) in newts and (B) phenotypic TTX resistance (50%  
 399 MAMU dose) in snakes along the latitudinal transect. Error bars indicate 95% confidence  
 400 intervals. The x-axis represents linear distance (km) from the northernmost sampling site  
 401 (Clallam; 0 km). For snakes, the frequency of TTX-resistant alleles in the  $\text{Na}_v1.4$  channel is  
 402 shown with pie charts proportional to sample size. To the right, the schematic of  $\text{Na}_v1.4$  shows  
 403 the four domains of the channel (DI–DIV), with the extracellular pore loops (p-loops)  
 404 highlighted with bold lines. Specific amino acid changes in the DIV p-loop are shown in their  
 405 relative positions within the pore. The TTX-sensitive ancestral sequence (purple) is listed,  
 406 followed by the two derived alleles known to confer increases in channel resistance in this  
 407 lineage. (C) Map inset illustrates population estimates of prey toxins and predator resistance at  
 408 each location in the geographic mosaic. Blue colors correspond to low estimates of TTX  
 409 (squares) or resistance (circles), whereas red indicates escalated phenotypes in the arms race.

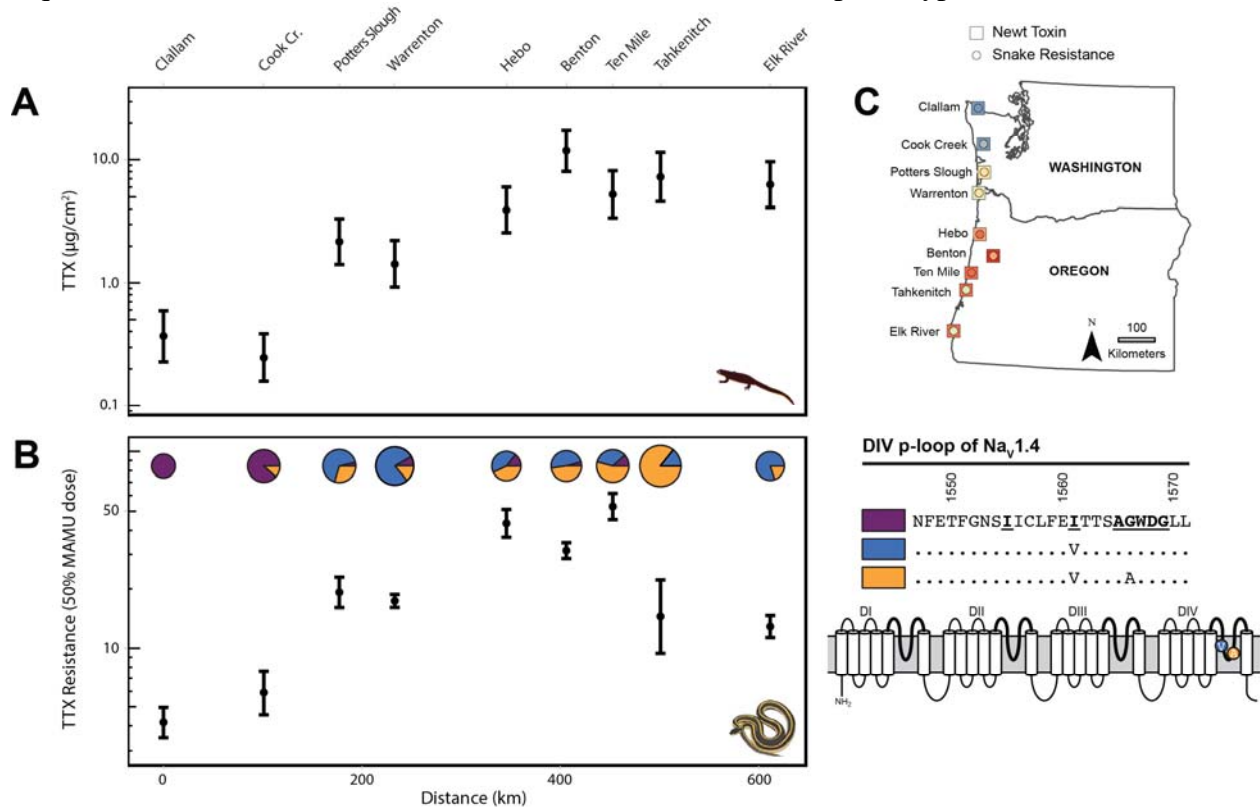

411 **Fig. 2. Populations of prey and predator differ in geographic structure.** Results from the  
412 principal coordinate (PCoA) and STRUCTURE analyses of neutral SNPs from newts and  
413 snakes. PCoA graphs are rotated 90° to emphasize the major axis of variation corresponding to  
414 latitude. The PC 1 values for each individual were used as a neutral expectation in the cline-  
415 fitting analyses. STRUCTURE plots are arranged latitudinally by population, in the same order  
416 as the map. Each horizontal bar represents the ancestry assignment of an individual, with  
417 populations separated by white dashed lines.

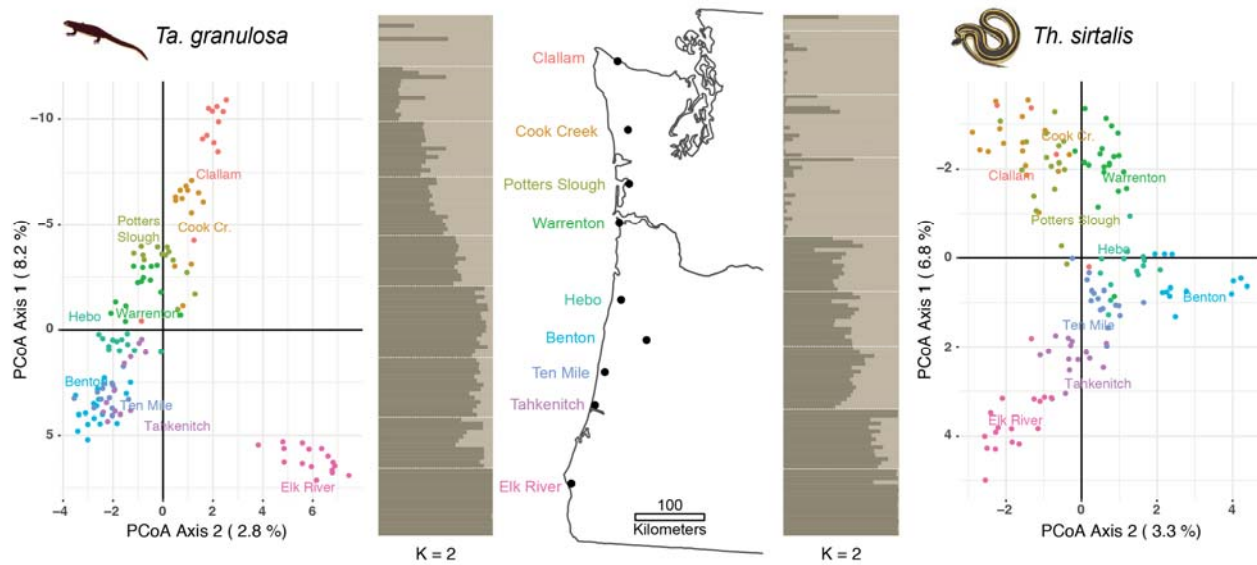

418

419 **Fig. 3. Levels of prey toxin are best predicted by neutral population structure, whereas**  
420 **predator resistance is predicted by prey toxins.** Cline-fitting results for phenotypic and  
421 genetic variation are shown, with error bars indicating confidence intervals surrounding the  
422 geographic cline centers. **(A)** Phenotypic clines of TTX levels ( $\log[\text{TTX } \mu\text{g}/\text{cm}^2 + 0.1]$ ) and **(B)**  
423 TTX resistance ( $\ln[\text{MAMU} + 1]$ ) are shown in red. For snakes, the frequency of TTX-resistant  
424 alleles in the  $\text{Nav}1.4$  channel was also modeled (in black). Gray dashed lines represent the  
425 neutral expectation for trait variation due to population structure, based on the PCoA. The cline  
426 center points of TTX levels and neutral PC 1 in newts, and phenotypic resistance and TTX-  
427 resistant alleles in snakes, are all located within in 84 km of each other along the 611 km  
428 transect.

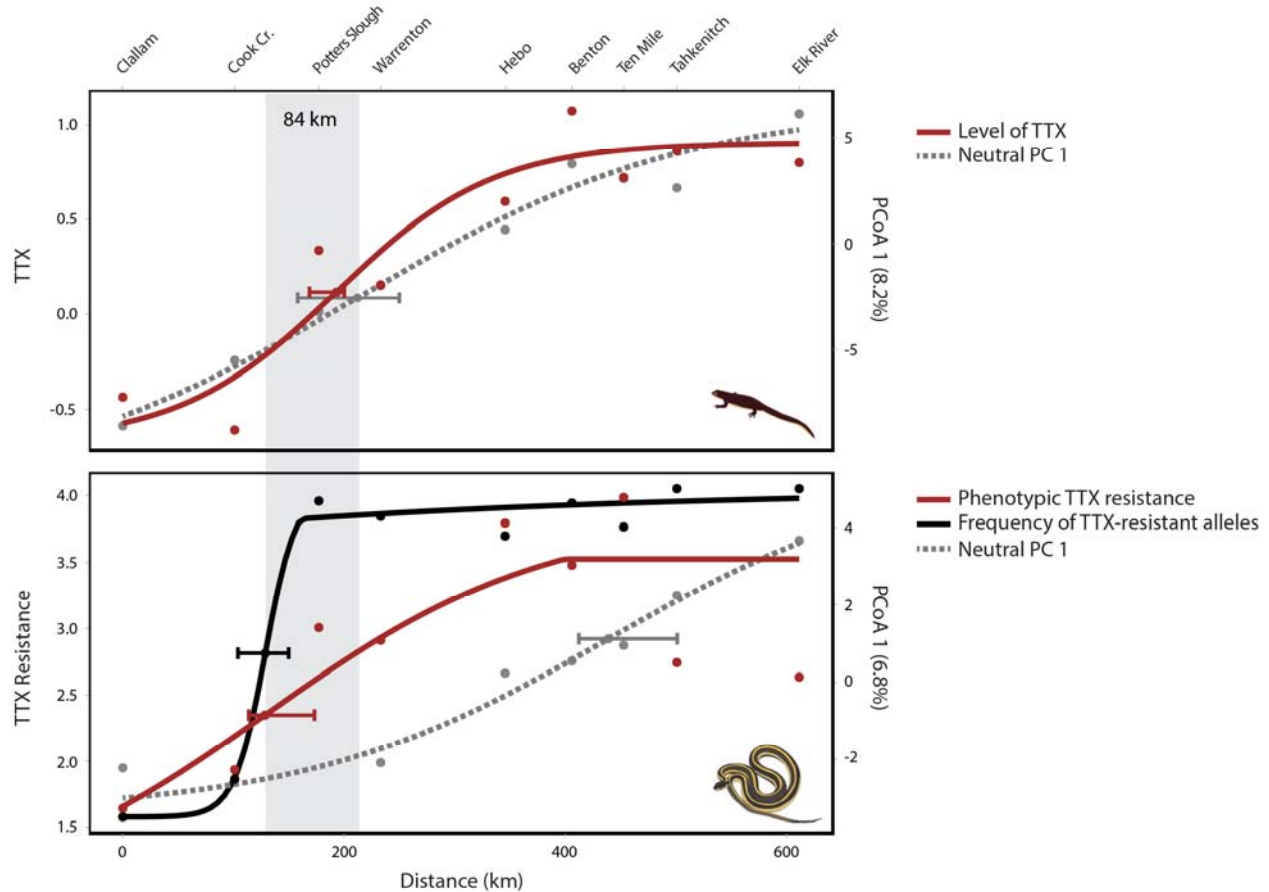

430 **Table 1.** Results from multiple regression of distance matrices (MRMs) comparing population  
 431 divergence in phenotypic and genetic data.  
 432

| Response Variable                   | Explanatory Variable(s)                  | Coefficient | p-value       | R <sup>2</sup> |
|-------------------------------------|------------------------------------------|-------------|---------------|----------------|
| Newt TTX levels                     | Neutral F <sub>ST</sub> of newts         | 5.998       | <b>0.002*</b> | 0.414          |
|                                     | TTX resistance of snakes                 | 0.415       | <b>0.019*</b> | 0.274          |
|                                     | Neutral F <sub>ST</sub> + TTX resistance |             |               |                |
|                                     | Neutral F <sub>ST</sub> of newts         | 4.827       | <b>0.006*</b> | 0.501          |
|                                     | TTX resistance of snakes                 | 0.253       | 0.065         |                |
| Snake TTX resistance                | Neutral F <sub>ST</sub> of snakes        | 1.442       | 0.719         | 0.006          |
|                                     | TTX level of newts                       | 0.662       | <b>0.021*</b> | 0.274          |
|                                     | Neutral F <sub>ST</sub> + TTX toxicity   |             |               |                |
|                                     | Neutral F <sub>ST</sub> of snakes        | -5.830      | 0.189         | 0.338          |
|                                     | TTX level of newts                       | 0.873       | <b>0.011*</b> |                |
|                                     | Neutral F <sub>ST</sub> of newts         | 4.632       | <b>0.035*</b> | 0.155          |
| Snake F <sub>ST</sub> of DIV p-loop | Neutral F <sub>ST</sub> of snakes        | 2.649       | 0.202         | 0.080          |
|                                     | Neutral F <sub>ST</sub> of newts         | 3.196       | <b>0.010*</b> | 0.311          |

433
